1 **Prophage elements function as reservoir for antibiotic resistance and virulence genes in**

2 **nosocomial pathogens**

3 Kohei Kondo<sup>a,#</sup>, Mitsuoki Kawano<sup>b</sup>, Motoyuki Sugai<sup>a</sup>

4 <sup>a</sup>Antimicrobial Resistance Research Center, National Institute of Infectious Diseases, Higashi

5 Murayama, Tokyo, Japan

6 <sup>b</sup>Department of Human Nutrition, Faculty of Contemporary Life Science, Chugokugakuen

7 University, Kita-ku, Okayama, Japan

8

9 Running head: AMR genes in prophages of ESKAPE pathogens and *E. coli*

10 #Correspondence to: [kondo-k@niid.go.jp](mailto:kondo-k@niid.go.jp)

## 11 **Abstract**

12 Prophages are often involved in host survival strategies and contribute toward increasing the  
13 genetic diversity of the host genome. Prophages also drive horizontal propagation of various  
14 genes as vehicles. However, there are few retrospective studies contributing to the  
15 propagation of antimicrobial resistance (AMR) and virulence factor (VF) genes by prophage.  
16 In this study, we extracted complete genome sequences of seven pathogens, including  
17 ESKAPE bacteria and *Escherichia coli* deposited in a public database, and examined the  
18 distribution of both AMR and VF genes in certain genomic regions of prophage, including  
19 prophage-like element. We found that the ratios of AMR and VF genes greatly varied among  
20 the seven species. More than 55% of *Enterobacter cloacae* strains had VF genes, but only  
21 0.8% of *Klebsiella pneumoniae* strains had VF genes from prophages. The prophage types  
22 carrying AMR genes were detected in a broad range of hosts, whereas prophages containing  
23 VF genes were conserved in only one or two species, suggesting that distribution patterns of  
24 prophages were different between prophages encoding AMR or VF genes. We also found that  
25 the prophage containing class 1 integrase possessed a significantly higher number of AMR  
26 genes than prophages with no class 1 integrase. Moreover, AMR genes in the prophage were  
27 located near transposase and integrase. The results of this study reveal a comprehensive  
28 picture of AMR and VF genes present in prophage elements and provide new insights into  
29 the horizontal transfer of genes associated with antimicrobial resistance and pathogenicity.

## 30 **Importance**

31 Although we believe phages play an important role in horizontal gene transfer in  
32 exchanging genetic material, we do not know the distribution of the antimicrobial resistance  
33 and/or virulence genes in prophages. We collected different prophage elements from the  
34 complete genome sequence of seven species – *Enterococcus faecium*, *Staphylococcus aureus*,  
35 *Klebsiella pneumoniae*, *Acinetobacter baumannii*, *Pseudomonas aeruginosa*, and  
36 *Enterobacter cloacae*, as well as *Escherichia coli* –, and characterized the distribution of  
37 antimicrobial resistance and virulence genes encoded in the prophage region. While virulence  
38 genes in prophage were found to be species-specific, antimicrobial resistance genes in  
39 prophages were highly conserved in various species. Integron structure was detected within  
40 prophage regions in almost all of the genera. Maximum of 11 antimicrobial resistance genes  
41 were found in a single prophage region, suggesting that prophages act as a reservoir for  
42 antimicrobial resistance genes. Our results highlight new insights on prophages as horizontal  
43 gene carriers.

44

## 45 **Introduction**

46 Antimicrobial resistance (AMR) is a global public health issue. In recent years, ESKAPE  
47 pathogens (*Enterococcus faecium*, *Staphylococcus aureus*, *Klebsiella pneumoniae*,  
48 *Acinetobacter baumannii*, *Pseudomonas aeruginosa*, and *Enterobacter* spp.) have become a  
49 threat since they are the leading cause of nosocomial infection and easily escape from  
50 authentic chemotherapy due to their antimicrobial-resistant phenotype and many countries  
51 have faced difficulties in controlling these pathogens (1, 2). In Japan, *Escherichia coli* has  
52 replaced *Staphylococcus aureus* as the primary pathogen isolated from clinical samples in  
53 hospitals since 2018, and isolation of third-generation cephalosporin- or quinolone-resistant  
54 *E. coli* continues to increase in Japan (<https://janis.mhlw.go.jp>). Moreover, the extended-  
55 spectrum of  $\beta$ -lactamase-producing *E. coli* is spreading worldwide (3). These ESKAPE and  
56 *E. coli* are major AMR pathogens in nosocomial settings.

57 A bacteriophage (phage) is a virus that infects bacteria. As soon as a phage adsorbs to the  
58 host's cell wall, the phage genome is injected into the host cell. Temperate phages follow one  
59 of the two life cycles afterwards; the lysogenic cycle or the lytic cycle. In the lysogenic cycle,  
60 the phage genome is integrated into the host chromosome and it is called a prophage. In the  
61 lytic cycle, the prophage is induced to produce progeny phages in response to chemical or  
62 physical stressors (4, 5). Lysogenic phages or prophages are known to drive horizontal gene  
63 transfer (HGT) through transduction, but they also play an important role in increasing the

64 genetic diversity of the host (6–10). Furthermore, defective prophages, also known as  
65 prophage-like elements, are stable in the host genome despite deleting most of the phage  
66 genes (6) and are known to increase host survival by conferring resistance against various  
67 stresses (11–13).

68 Plasmid conjugation has been well established as the major means of HGT of (AMR) genes  
69 (14), but recent studies have shed light on the role of phages in HGT of AMR genes since  
70 they are often encoded within the genome of the phage or prophage (15, 16). Metagenomic  
71 analysis revealed that AMR genes, such as  $\beta$ -lactamases, are found in the phage genome (17–  
72 19). A clinical study reported that phages harboring AMR genes were identified in samples  
73 from patients with cystic fibrosis (20). Costa et al. reported that many prophage regions  
74 within the *A. baumannii* genome possessed several AMR and virulence factor (VF) genes  
75 using a bioinformatics approach (21). These studies have implied that phages and prophages  
76 probably transduce AMR genes more frequently than expected. However, the relationship  
77 between prophages and AMR genes has not been fully explored.

78 Pathogenic or VF genes in prophages have been mainly studied in *S. aureus* (22, 23), *E. coli*  
79 (24, 25), *Salmonella enterica* (26), and *Vibrio* spp. (27, 28), and their pathogenicity is  
80 associated with VFs encoded by the prophages. Other reports revealed that the expression of  
81 the Shiga toxin in *E. coli* (29) and mitogen factor in *Streptococcus canis* (30) depends on  
82 prophage induction. The studies mentioned above indicate that it is important to investigate

83 the connection between host pathogenicity and their prophage to reveal their pathogenesis.

84 However, there is very little known on the relationship between virulence and prophages in

85 the rapidly emerging multidrug-resistant bacteria, such as ESKAPE pathogens and *E. coli*.

86 This study aims to understand the distribution of AMR and VF genes encoded in prophages,

87 including the intact region, prophage-like elements, and satellite prophages (31) comprised in

88 the bacterial genome, and discover their specific structural genomic features beyond the

89 genera. We focus on seven clinically important AMR pathogens including ESKAPE

90 pathogens and *E. coli* and analyzed their complete genomes deposited in a database to mine

91 the prophage structure.

92

## 93 **Results**

### 94 **Comparison of host genome size and the number of prophages**

95 We investigated the correlation between the host genome size and the number of prophage

96 elements present. The Pearson's correlation coefficients (R-values) of each species were

97 0.57 for *A. baumannii*, 0.51 for *E. cloacae*, 0.76 for *E. coli*, 0.67 for *E. faecium*, 0.51 for *K.*

98 *pneumoniae*, 0.67 for *P. aeruginosa*, and 0.63 for *S. aureus*. The R-values for all species

99 were greater than 0.5, indicating that the number of prophages positively correlated with the

100 host genome size (Fig. 1A).

101 Next, we analyzed the number of prophages and prophage-like elements in each species.  
102 The number of prophages in *E. coli* was significantly higher compared to that in other species  
103 (Fig. 1B) ( $P < 0.001$ ): *E. coli* possessed a maximum of 24 prophages (Accession numbers:  
104 CP027459 and CP024618) in which you can find prophages harboring Shiga toxin genes,  
105 *stx2A* and *stx2B*.

106 Screening for prophage elements in plasmids yielded a few cases, as depicted in Fig. S1.  
107 Comparison of the numbers of prophages in plasmids indicated that most *K. pneumoniae*  
108 plasmids harbored at least one or more prophages or prophage-like elements, and some *S.*  
109 *aureus* plasmids possessed one prophage or prophage-like element. However, *A. baumannii*  
110 possessed no plasmids harboring prophage or prophage-like elements. The number of  
111 prophages harbored in *K. pneumoniae* plasmids was significantly higher compared with that  
112 in *A. baumannii* and *S. aureus* plasmids ( $p = 4.7 \times 10^{-5}$  and  $p = 0.0011$ , respectively) (Fig.  
113 S1). AMR genes from prophage elements were encoded in plasmids found in *E. faecium*  
114 (LC495616) and *K. pneumoniae* (AP018748, AP018752, AP018755 and AP018673),  
115 whereas no VF genes were detected on plasmid-harboring prophages in the accession  
116 numbers used in this experiment.

117

118 **The proportion of the number of AMR or VF genes to that of prophages in the host**  
119 **genome**

120 We next examined the proportion of prophage elements encoding either AMR or VF genes.

121 The proportions of prophages encoding VF genes were relatively high in *E. cloacae*, *E. coli*,

122 *E. faecium*, and *S. aureus* (74.1, 65.4, 46.5, and 88.8%, respectively) (Fig. 2). In contrast, no

123 prophages with VFs were detected in *A. baumannii*. Similarly, *K. pneumoniae* and *P.*

124 *aeruginosa* also showed a low proportion of VFs harbored in corresponding prophages (0.8

125 and 11.6%, respectively) (Fig. 2).

126 Prophage regions encoding AMR genes were detected in all species. The proportions were

127 21.2% for *A. baumannii*, 18.5% for *E. cloacae*, 13.3% for *E. coli*, 5.8% for *E. faecium*, 24.7%

128 for *K. pneumoniae*, 19.4% for *P. aeruginosa*, and 14% for *S. aureus*. The proportion of the

129 host genome that contained both AMR and VF genes in prophages was 14.8% for *E. cloacae*,

130 11.1% for *E. coli*, 2.3% for *E. faecium*, 0.3% for *K. pneumoniae*, 1.7% for *P. aeruginosa*, and

131 12.3% for *S. aureus* (Fig. 2). Overall, the differences in proportions for each species indicated

132 that the ratio between AMR and VF genes differed greatly depending on the species.

133

### 134 **Different prophage types encode either AMR or VF genes**

135 We investigated the phage types integrated into the genome in each species. The name of

136 each phage type was described using the most common phage from the PHASTER database.

137 Phage types carrying AMR gene(s) are listed in Fig. 3 and aligned according to the number of

138 phage types harboring AMR gene(s) (Fig. 3). The number of phage types harboring AMR



139 genes was 46 (Fig. 3). Notably, the major phage types carrying AMR gene(s), Escher\_RCS47  
140 (RCS47), Entero\_phi80, and Salmon\_SJ46, were present in multiple species beyond the  
141 generic barrier. The Escher\_RSC47 phage type was detected in all species except for *S.*  
142 *aureus*, and the Staphy\_SPbeta\_like phage type was detected in all species except for *E.*  
143 *cloacae* (Fig. 3).

144 In contrast, we found that VF genes were widely distributed in a large number of phage  
145 types. There were 80 phage types, which were 1.7-fold higher than those harboring AMR  
146 genes. Furthermore, the prophage types carrying VF genes were different from those carrying  
147 AMR genes. Most of the phage types carrying VF genes, including ENT47670, phiFL1A,  
148 and Diva, were not detected in the prophages carrying AMR genes (Fig. 3). In addition,  
149 widely distributed VF-encoding prophages were not observed in various species. Overall,  
150 these results indicated that AMR and VF genes rarely coexisted within the same prophage  
151 and distribution pattern of prophage types containing AMR genes were different from that of  
152 VF-encoding prophage types.

153

#### 154 **Comparing complete genomes of prophages harboring AMR and VF genes**

155 We investigated and compared the completeness of prophage-encoding regions carrying  
156 AMR and VF genes. The regions were classified using criteria from PHASTER as follows;  
157 (1) intact, (2) questionable, or (3) incomplete. As shown in Fig. 4, percentages of prophages

158 with AMR genes were 30.4%, 43.7%, and 27.1% for incomplete, intact, and questionable  
159 ones, respectively. Prophages carrying VF genes were mostly intact (70.3%), which indicated  
160 that the prophage retained most of its region, whereas 19.4 and 10.7% were incomplete and  
161 questionable phages, respectively (Fig. 4). In contrast to prophages carrying AMR genes,  
162 those carrying VF genes often encoded proteins that were crucial for the structure of the  
163 phage, such as the head, tail, and baseplate (Data Set S6 and S7). These phages were likely to  
164 produce progeny phages infecting other hosts. All prophages encoding Shiga toxins in *E. coli*  
165 were intact and contained phage structural proteins (Data Set S5). These data suggested that  
166 VF genes in prophages, such as the Shiga toxin gene could be easily transduced by a  
167 prophage.

168

### 169 **Characterization of VF genes in prophages**

170 To further investigate VF genes in prophage elements, VF genes for each accession number  
171 were examined using the VFDB from ABRicate and the presence of VF genes in prophages  
172 was visualized in the matrix (Fig. 5).

173 Prevalence of prophage-encoded VF genes was unique to each species (Fig. 5). For  
174 example, we detected *gtrA* and *gtrB* in *E. cloacae* and *E. coli* strains and in just one *K.*  
175 *pneumoniae* strain but not in other species (Fig. 5). Bacteriophage ENT47670 (accession  
176 number: NC\_019927) contained *gtrA* and *gtrB*. Interestingly, intact ENT47670 prophage,

177 which also contained structural phage proteins, was detected in the prophage region where  
178 *gtrA* and *gtrB* were harbored (Data Set S5). This result suggested that *gtrA* and *gtrB* of the  
179 prophage region in *E. cloacae* were acquired through the transduction of ENT47670 or  
180 ENT47670-like phages (32) (Fig. 5; Data Set S5).

181 Most *E. faecium* had two specific genes in the prophage regions; *bsh* encoding a bile salt  
182 hydrolase and *clpP* encoding an ATP-dependent protease, but other species did not (Fig. 5).  
183 We mapped the prophage region harboring *bsh* and *clpP* in *E. faecium* using Easyfig (Fig.  
184 S2). We found that these genes were generally located at or near the gaps in the genome, and  
185 were scattered at various locations in the chromosome. These data suggested that coding  
186 regions *bsh* and/or *clpP* in prophages or prophage-like elements were successfully acquired  
187 via HGT. Classification of VF genes encoded by prophages revealed via VFDB keywords  
188 revealed that each species possesses functionally unique VF genes (Fig. S3).

189

### 190 **Characterization of AMR genes encoded by or nearby prophage elements**

191 To investigate AMR gene distribution in the prophage elements of each strain in detail,  
192 AMR genes in the prophage region for each accession number were extracted using the  
193 ResFinder database from ABRicate and classified based on predicted substrates and mutation  
194 locations (See material and methods). Predicted substrates were described in Data Set S2. All

195 species appeared to carry aminoglycoside modifying enzyme gene(s) and  $\beta$ -lactamase  
196 encoding gene(s) except for *E. faecium* (Fig. 6).  
197 In contrast, species-specific AMR genes were also detected. For instance, *A. baumannii*  
198 harbored *msrE*, encoding the subunit for the ABC transporter and conferring resistance to  
199 erythromycin and streptomycin. *vanHBX*, conferring resistance to vancomycin, was detected  
200 in only *E. faecium*, and *vanHBX* was harbored in “intact” prophages with the genes encoding  
201 some structural proteins (Data Set S4). This data suggested that a part of *van* family of genes  
202 in vancomycin-resistant *E. faecium* were acquired via phage transduction. *bla<sub>CTX-M</sub>* (33) was  
203 detected in the prophage region of several *K. pneumoniae* strains and only one *E. coli* strain  
204 (Fig. 6).

205 AMR gene cassettes were widely detected in various species. For instance, *K. pneumoniae*  
206 contained a cassette array of AMR genes including *sul1*, *aadA*, and *aacA* (Fig. 6). To detect  
207 the combination or the gene cassette of AMR genes harbored by prophage elements, we  
208 classified and clustered AMR gene cassettes for each prophage type (Fig. 7). Escher\_RCS47,  
209 Salmon\_SJ46, Acineto\_vB\_AbaM\_ME3, and Staphy\_SPbeta\_like harbored various AMR  
210 genes (Fig. 7). In contrast, regions from prophages Entero\_phi80, Entero\_P1, and  
211 Escher\_HK639 harbored a set of AMR genes including *sul1\_5*, *aac(3)\_lb\_1*, and *aadA2\_1*  
212 (Fig. 7). Another cassette array containing *ant(3'')-la\_1*, *aph(3'')-la\_7*, and *bla<sub>TEM-1D\_1</sub>*  
213 was detected in Escher\_RCS47, Staphy\_SPbeta\_like, and Salmon\_SJ46. Since these AMR

214 gene-combinations detected on prophage regions resemble the integron cassette array, we  
215 tried to identify the integrons in these prophage regions using the INTEGRALL database. We  
216 found that prophage regions in all species, except for *E. faecium* and *S. aureus*, possessed  
217 class 1 integrase. Therefore, we considered these characteristic regions containing AMR  
218 genes cassette array as an integron cassette array (Data Set S4).

219 Next, we wondered if the prophage region containing integrons had a higher number of  
220 AMR genes than regions without integrons (Fig. 8). We examined the number of AMR genes  
221 in phage regions carrying integrons (Int/P, red), in those without integrons (No-int, green),  
222 and in strains where integrons were present somewhere other than the prophage region (No-  
223 Int/P, blue).

224 Most of the phage regions (97%) carrying an integron possessed three or more AMR genes,  
225 whereas nearly 55% of phage regions without an integron possessed fewer AMR genes (Fig.  
226 8A). These results indicated that the number of AMR genes were significantly higher in  
227 prophages with integrons than that in other groups (Fig. 8B).

228

### 229 **Structural features of prophage elements containing AMR genes**

230 We briefly overviewed structural features of the prophage region and its association with  
231 AMR gene(s) by showing representative prophage sequences (Fig. 9). The prophage regions  
232 within the attachment sites (*attL* and *attR*) are shown in Figure 9. AMR genes in intact

233 prophage regions existed either between or near integrase and/or transposase (Fig. 9A and B).  
234 Furthermore, AMR genes were located at the end of the prophage region, whereas the central  
235 position in the prophage region often encoded essential phage genes, especially structural  
236 proteins. Salmon\_Fels\_2, intact phage detected using PHASTER, lacked class 1 integron-  
237 integrase but phage-derived integrase was present just next to AMR gene(s) (Fig. 9A). We  
238 next visualized the prophage regions from Acineto\_vB\_AbaM\_ME3, which were designated  
239 as incomplete or questionable phages using PHASTER and were termed as defective  
240 prophages (Fig. 9B). The prophage region from Acineto\_vB\_AbaM\_ME3 had two different  
241 gene cassettes containing class 1 integrase and transposase, and both were located at the end  
242 of the region. The Acineto\_vB\_AbaM\_ME3 type prophage region in strain CP020603 carried  
243 11 AMR genes, which was the highest number per prophage-like elements in this study (Fig.  
244 9B; Data Set S6).

245 In contrast to phage type described above, representative Escher\_RCS47, which were  
246 classified as either incomplete or questionable, were devoid of most phage genes and their  
247 phage-derived transposases, and integrases were randomly arranged. Furthermore, AMR  
248 genes were located not only at the end but also at various positions including the center of the  
249 prophage sequence (Fig. 9C). The Escher\_RCS47 prophage region was conserved in various  
250 species, and the characteristics of this prophage region might imply that these prophages had  
251 been integrated into the host genome for a long time. These results suggested that even

252 though many phage structural genes had been deleted in evolutionary processes, the  
253 important genes for host survival, such as AMR genes, might have accumulated in such a  
254 conservative prophage region.

255

## 256 **Discussion**

257 In this study, we collected the prophage elements from a total of 1,623 complete genomes of  
258 nosocomial AMR pathogens deposited in a public database and characterized AMR and VF  
259 genes harbored. Due to multi-drug resistance, ESKAPE bacteria have become a threat to  
260 global health, especially in elder patients. HGT agents, such as plasmids, prophages, and  
261 transposons often carry AMR and VF genes and move from bacteria to bacteria. Phage or  
262 prophage-carrying AMR genes are reported to be minor HGT agents (34, 35). In recent years,  
263 however, several studies have reported that AMR genes are present in the phage or prophage  
264 region (36–39), implying that they are associated with the prophage region more than  
265 expected. Nevertheless, there have been few reports comprehensively identifying and  
266 analyzing AMR/VF genes encoded in the prophage region of nosocomial AMR pathogens.

267 A previous representative metagenomic study has reported that phage regions encode almost  
268 no AMR genes (34). However, our study uncovered that the proportion of bacteria carrying  
269 AMR genes on prophage-like elements reached 10–20% in each species (Fig. 2). Our results  
270 suggested that the proportion of AMR genes encoded by prophages and defective prophages

271 was higher than that of those encoded in the genome of phage particles and that AMR genes  
272 were preferentially accumulated in the prophage sequence and were stably inherited in the  
273 host genome (6). To date, plasmids are the most well studied HGT agent. Nonetheless, herein  
274 we did not compare the AMR gene richness between plasmids and prophage regions. Several  
275 prophage-like elements encoding AMR genes were inserted, and shared AMR genes in a  
276 plasmid; thus, we solely focused on the prevalence of AMR genes encoded by prophage  
277 regions, to shed light on previously overlooked contribution of prophages in AMR gene  
278 propagation.

279 We found that 57.5% of the prophages encoding AMR genes were defective prophages  
280 (defined as incomplete or questionable using PHASTER) (Fig. 4), and they lacked phage  
281 structural proteins (Fig. 4). Even if the prophage regions with AMR genes were determined  
282 as “intact”, these prophages often carried no structural genes (Data Set S4). One may  
283 speculate that these defective prophages cannot produce progeny phages due to the loss of  
284 structural proteins. However, Hayashi et al. has reported that several defective prophages  
285 encoding Shiga toxins in the genome of Enterohemorrhagic *E. coli* (EHEC) O157:H7 can  
286 produce progeny phages and that progeny phages can infect to other hosts (40). They have  
287 considered that prophages can complement each gene required for progeny phage  
288 propagation by sharing and using genes present in several prophage regions. Based on



289 Hayashi's report, we speculated that several defective prophages carrying AMR genes can  
290 complement the genes from each prophage region to synthesize progeny phages.

291 Prophage induction is triggered mainly by DNA damage via SOS response, and the host is  
292 lysed by the phage lysin. We found that more than 57.5% of AMR gene-harboring prophages  
293 were defective, whereas intact prophage was dominant in VF gene-harboring prophages  
294 (70.4%) (Fig. 4). A previous study has shown that prophages confer antibiotic resistance to  
295 the host and result in an increase of host viability (41). In other words, the host takes the  
296 advantage of AMR gene products of prophages for survival. A recent study has reported that  
297 the induction frequency of prophage carrying AMR genes decreases under the presence of  
298 antibiotics (42). As a result, prophages tend to become defective more frequently and are  
299 inherited in the host genome (43). In contrast, it has been reported that VF genes encoded in  
300 prophage can contribute to increasing phage infectivity by increasing the burst size and the  
301 latent period (44). In addition, prophages often harbor the genes involved in superinfection  
302 exclusion, which is a phenomenon that phage or prophage prevents infection by other phages  
303 (45, 46), and such genes are associated with host virulence (44). Therefore, we speculated  
304 that VF genes encoded in prophages have presumably more benefits for the prophage rather  
305 than bacteria, and the selective pressure of becoming defective is hardly caused in VF gene-  
306 encoding prophage. As a result, prophages containing VF genes tend to remain "intact" with  
307 phage structural genes.

308 Our results showed that most VF genes on prophage element were species-specific (Fig. 5),  
309 presumably because the mechanism of virulence to the host, such as the entry into the  
310 mammalian body (cell), and the toxicity differs depending on the species. Thus, each VF  
311 gene, which is responsible for virulence, could be detected in a species-specific manner. In  
312 contrast, modes of action of antimicrobials are common among bacterial species, and AMR  
313 genes are mobilized among bacterial genera through horizontal transfer; thus, similar AMR  
314 genes encoded in prophage elements are conserved in various bacterial species.

315 It has been known that genes for aminoglycoside modification enzyme and  $\beta$ -lactamase are  
316 widely conserved in various species (47, 48). In this study, these resistance genes were  
317 detected in or nearby prophages and prophage-like elements of almost all species, in  
318 accordance with previous studied (47, 48) (Fig. 6), suggesting that phages were related to  
319 HGT of these highly conserved AMR genes. A previous study showed that different  
320 subclasses of aminoglycoside nucleotidyltransferase (ANT) were detected in Gram-positive  
321 and -negative bacteria (49). While Gram-positive bacteria often possess ANT (4', 6', 9'),  
322 Gram-negative bacteria often have ANT (2'', 3''). In this study, ANT (6, 9) were detected on  
323 the prophage of *E. faecium* and *S. aureus*, but were rarely detected in Gram-negative bacteria  
324 (Fig. 6) in agreement with previous reports (49).

325 Duplication of the same AMR genes was detected in a single prophage region in particular,  
326 two or more aminoglycoside resistance genes with different mutations or subtypes were

327 detected in a single prophage (Data Set S4). Duplication of AMR genes in prophage can  
328 increase the expression level and resistance to antibiotics (50). Furthermore, gene duplication  
329 or the increase of copy number is suggested to result in tolerance to mutations (51),  
330 accelerating evolution and genetic diversity (52). Thus, prophage element region may be a  
331 factory of producing AMR genes, which may result in the host rapidly becoming resistant to  
332 novel antibiotics.

333 We found that many prophages harboring AMR genes possessed an integron structure, and  
334 the number of AMR genes in integron-harboring prophages were significantly higher than  
335 that in prophage regions without an integron (Fig. 8). Some prophages with an integron have  
336 a characteristic structure with two different integron cassettes and a maximum of 11 AMR  
337 genes integrated into one prophage (Fig. 9). We proposed that the prophage region had a role  
338 as a reservoir for AMR genes. Integron structure was not detected in *E. faecium* and *S. aureus*  
339 prophage regions, and prophages without an integron structure often possessed a prophage-  
340 derived transposase near AMR gene(s). Interestingly, prophages RCS47, SJ46, and SPbeta-  
341 like phages, which have been detected in various species, harbor AMR genes and HGT-  
342 related genes in the original phage genome (53). Probably, phages carrying HGT-related  
343 genes could be key players to promote the transfer and accumulation of AMR genes. Even if  
344 the prophage region loses its infectivity due to genome incompleteness, AMR genes can be  
345 transferred by transposase (and integrase) derived from the phage. The Mu-like phage is

346 present on a plasmid and the transposon Tn21 encoded in the phage region of the plasmid  
347 shared AMR genes (54). Overall, transposase derived from prophage has the potential to  
348 transfer AMR genes.

349 This study has some limitations. Some samples were collected from identical places, such as  
350 the same hospital or area, and the prophage regions of the genome from the same location  
351 were similar. Thus, further studies should focus on the relationships between the location and  
352 features of prophages. The sample number is uneven between each species. For example, the  
353 sample number of *E. cloacae* was 27, while that of *S. aureus* was 408. Since most of the  
354 complete genomes of *E. coli* are the EHEC, Stx (classified as “Toxin” in Fig. S3) and type III  
355 secretion systems were detected using the VFDB database, in agreement with previous  
356 reports (55, 56). Therefore, the distribution of VF genes and the percentage of Toxin and type  
357 III system harbored by prophages may have been influenced by the *E. coli* EHEC data. To  
358 analyze detailed and precise prophage sequence structure, we utilized a highly accurate  
359 prophage sequence using the National Center for Biotechnology Information (NCBI) RefSeq  
360 (57). We believe that our finding was endowed using not miscellaneous sequences but  
361 RefSeq, which curated highly accurate sequences.

362 Overall, we comprehensively detected AMR and VF genes in a wide range of strains, and  
363 our results will shed light on the important roles of phages as reservoirs and factors that  
364 transfer AMR/VF genes. Further research is needed to elucidate the amount of AMR and VF

365 genes that are transferred to other strains via transduction in a clinical and natural  
366 environment.

367

## 368 **Materials and methods**

### 369 **Data collection and prophage region detection**

370 We compiled complete genomes and RefSeq data of seven bacterial species (169 sequences  
371 of *A. baumannii*, 27 sequences of *E. cloacae*, 324 sequences of *E. coli*, 88 sequences of *E.*  
372 *faecium*, 408 sequences of *K. pneumoniae*, 183 sequences of *P. aeruginosa*, and 424  
373 sequences of *S. aureus*) from GenBank using Biopython version 1.76 (58). The genome size  
374 for each strain was referred to as the value described in GenBank (Data Set S1). Since *E. coli*  
375 had a large number of registrations on the NCBI, GenBank accession numbers were  
376 randomly selected so that the sample size would not increase. To detect prophages and  
377 prophage-like elements (28) for each strain, we used a custom application programming  
378 interface (API) from PHASTER (59). Prophage names were identified using the most  
379 common phage species described in PHASTER. Additionally, PHASTER was also used to  
380 classify prophages as either 1) “intact”, 2) “questionable”, or 3) “incomplete” based on the  
381 length of the phage region and the number of phage-derived genes (Data Set S4 and S5).

382

### 383 **Detection of AMR and VF genes**

384 AMR and VF genes encoded by the prophage sequences were extracted using ABRicate  
385 version 1.0.1 (<https://github.com/tseemann/abricate>) under default settings. The ResFinder  
386 database (60) was used to detect AMR genes, and the Virulence Factors Database (VFDB)  
387 (61) was used to detect VF genes. VFs were classified based on VFDB keywords, and  
388 redundant (similar) keywords were summarized into short words (e.g., “adhesion,”  
389 “Apoptosis and Adherence,” and “Invasive” keywords were integrated into “Adherence,” and  
390 toxin-based genes were integrated into “toxin”). The same gene with a few, different  
391 mutations were distinguished as an accession number were assigned to each gene containing  
392 the respective mutation. Each of the genes was also assigned a “\_ X” suffix.

393

#### 394 **Integron analysis**

395 Integrons and antibiotic cassette gene arrays in prophages were detected using  
396 INTEGRALL (62). Ambiguous integrases encoded in prophage region were examined using  
397 Blastp (protein-protein BLAST). If the amino acid identity was more than 80%, it was  
398 considered as a class 1 integrase. Numbers were assigned based on the order of the gene  
399 cassette and we referred to the number described in INTEGRALL. We classified the results  
400 into three groups, depending on the type of integron arrangement, as follows: 1) Prophage  
401 region with a class 1 integrase (Int/P); 2) prophage region without a class 1 integrase (No-  
402 Int); 3) integrase present, but did not exist in the prophage region (No-Int/P).

## 403 **Prophage elements and other data visualization**

404 Prophage elements encoding *bsh* and *clpP*, were visualized using Blast Ring Image  
405 Generator (BRIG) version 0.95 (63). All BRIG parameters were set to default. Other  
406 prophage-related regions containing AMR genes were visualized using Easyfig version 2.2.2  
407 (64). The thresholds of BLAST hits in Easyfig were analyzed using the default value. To  
408 visualize, we selected Escher\_HK639, Entero\_186, and Salmon\_Fels\_2, which were regarded  
409 as “intact” phages, encoding a phage structure protein. Alternatively, we selected  
410 Acineto\_vB\_AbaM\_ME3, Entero\_phi80, and Escher\_RCS47, which were considered  
411 “incomplete” or “questionable” in PHASTER. The host accession number used for the  
412 analysis had three to five strains selected at random for each prophage. Other data were  
413 analyzed and visualized using Python 3.7.6 (Python Software Foundation,  
414 <https://www.python.org>), Matplotlib version 3.1.3, and Seaborn version 0.1.0.

415

## 416 **Statistical analysis**

417 Pearson R correlation was calculated using the default jointplot function in seaborn. All  
418 statistical analyses were conducted using a two-sided Welch's t-test using Python version  
419 3.7.6 and SciPy Module version 1.4.1, and  $P < 0.05$  was considered as a significant  
420 difference.

421

## 422 **Data availability**

423 This study was performed using complete genomes registered on the NCBI. All accession  
424 numbers are listed in Data Set S1. All information on AMR and VF genes detected in this  
425 study are described in Data Set S2, S3. The information on prophages and AMR/VF genes  
426 including integron are summarized in Data Set S4 and S5. The presence of attachment sites  
427 (*attL*, *attR*) in each prophage region is described in Data Set S6, S7.

428

## 429 **Acknowledgments**

430 We are grateful to Professor Yoshitoshi Ogura for his valuable suggestions on the manuscript.

431

## 432 **Reference**

- 433 1. Rice LB. 2008. Federal Funding for the Study of Antimicrobial Resistance in  
434 Nosocomial Pathogens: No ESKAPE. *J Infect Dis* 197:1079–1081.  
435 <https://doi.org/10.1086/533452>.
- 436 2. Mulani MS, Kamble EE, Kumkar SN, Tawre MS, Pardesi KR. 2019. Emerging  
437 strategies to combat ESKAPE pathogens in the era of antimicrobial resistance: A  
438 review. *Front Microbiol* 10:539. <https://doi.org/10.3389/fmicb.2019.00539>.
- 439 3. Chong Y, Shimoda S, Shimono N. 2018. Current epidemiology, genetic evolution and  
440 clinical impact of extended-spectrum  $\beta$ -lactamase-producing *Escherichia coli* and



- 441 *Klebsiella pneumoniae*. Infect Genet Evol 61:185–188.
- 442 <https://doi.org/10.1016/j.meegid.2018.04.005>.
- 443 4. Choi J, Kotay SM, Goel R. 2010. Various physico-chemical stress factors cause  
444 prophage induction in *Nitrosospira multiformis* 25196- an ammonia oxidizing bacteria.  
445 Water Res 44:4550–4558. <https://doi.org/10.1016/j.watres.2010.04.040>.
- 446 5. Boling L, Cuevas DA, Grasis JA, Kang HS, Knowles B, Levi K, Maughan H, McNair  
447 K, Rojas MI, Sanchez SE, Smurthwaite C, Rohwer F. 2020. Dietary prophage inducers  
448 and antimicrobials: toward landscaping the human gut microbiome. Gut Microbes  
449 4:721–734. <https://doi.org/10.1080/19490976.2019.1701353>.
- 450 6. Bobay LM, Rocha EPC, Touchon M. 2013. The adaptation of temperate  
451 bacteriophages to their host genomes. Mol Biol Evol 30:737–751.  
452 <https://doi.org/10.1093/molbev/mss279>.
- 453 7. Croucher NJ, Coupland PG, Stevenson AE, Callendrello A, Bentley SD, Hanage WP.  
454 2014. Diversification of bacterial genome content through distinct mechanisms over  
455 different timescales. Nat Commun 5:5471. <https://doi.org/10.1038/ncomms6471>.
- 456 8. Wyres KL, Wick RR, Judd LM, Froumine R, Tokolyi A, Gorrie CL, Lam MMC,  
457 Duchêne S, Jenney A, Holt KE. 2019. Distinct evolutionary dynamics of horizontal  
458 gene transfer in drug resistant and virulent clones of *Klebsiella pneumoniae*. PLoS  
459 Genet 15:e1008114. <https://doi.org/10.1371/journal.pgen.1008114>.

- 460 9. Shen J, Zhou J, Xu Y, Xiu Z. 2020. Prophages contribute to genome plasticity of  
461 *Klebsiella pneumoniae* and may involve the chromosomal integration of ARGs in  
462 CG258. *Genomics* 112:998–1010. <https://doi.org/10.1016/j.ygeno.2019.06.016>.
- 463 10. de Sousa JAM, Buffet A, Haudiquet M, Rocha EPC, Rendueles O. 2020. Modular  
464 prophage interactions driven by capsule serotype select for capsule loss under phage  
465 predation. *ISME J* 30:1–7. <https://doi.org/10.1038/s41396-020-0726-z>.
- 466 11. Silver-Mysliwiec TH, Bramucci MG. 1990. Bacteriophage-enhanced sporulation:  
467 Comparison of spore-converting bacteriophages PMB12 and SP10. *J Bacteriol*  
468 172:1948–1953. <https://doi.org/10.1128/jb.172.4.1948-1953.1990>.
- 469 12. McGrath S, Fitzgerald GF, Van Sinderen D. 2002. Identification and characterization  
470 of phage-resistance genes in temperate lactococcal bacteriophages. *Mol Microbiol*  
471 43:509–520. <https://doi.org/10.1046/j.1365-2958.2002.02763.x>.
- 472 13. Aucouturier A, Chain F, Langella P, Bidnenko E. 2018. Characterization of a  
473 prophage-free derivative strain of *Lactococcus lactis* ssp. *lactis* IL1403 reveals the  
474 importance of prophages for phenotypic plasticity of the host. *Front Microbiol* 9:2032.  
475 <https://doi.org/10.3389/fmicb.2018.02032>.
- 476 14. Brown-Jaque M, Calero-Cáceres W, Muniesa M. 2015. Transfer of antibiotic-  
477 resistance genes via phage-related mobile elements. *Plasmid* 79:1–7.  
478 <https://doi.org/10.1016/j.plasmid.2015.01.001>.

- 479 15. Gómez-Gómez C, Blanco-Picazo P, Brown-Jaque M, Quirós P, Rodríguez-Rubio L,  
480 Cerdà-Cuellar M, Muniesa M. 2019. Infectious phage particles packaging antibiotic  
481 resistance genes found in meat products and chicken feces. *Sci Rep* 9:13281.  
482 <https://doi.org/10.1038/s41598-019-49898-0>.
- 483 16. López-Leal G, Santamaria RI, Cevallos MÁ, Gonzalez V, Castillo-Ramírez S. 2020.  
484 Prophages Encode Antibiotic Resistance Genes in *Acinetobacter baumannii*. *Microb*  
485 *Drug Resist* 00:10–12. <https://doi.org/10.1089/mdr.2019.0362>.
- 486 17. Anand T, Bera BC, Vaid RK, Barua S, Riyesh T, Virmani N, Hussain M, Singh RK,  
487 Tripathi BN. 2016. Abundance of antibiotic resistance genes in environmental  
488 bacteriophages. *J Gen Virol* 97:3458–3466. <https://doi.org/10.1099/jgv.0.000639>.
- 489 18. Rands CM, Starikova E V., Brüßow H, Kriventseva E V., Govorun VM, Zdobnov  
490 EM. 2018. ACI-1 beta-lactamase is widespread across human gut microbiomes due to  
491 transposons harboured by tailed prophages. *Environ Microbiol* 20:2288–2300.  
492 <https://doi.org/10.1111/1462-2920.14276>.
- 493 19. Moon K, Jeon JH, Kang I, Park KS, Lee K, Cha CJ, Lee SH, Cho JC. 2020.  
494 Freshwater viral metagenome reveals novel and functional phage-borne antibiotic  
495 resistance genes. *Microbiome* 8:75. <https://doi.org/10.1186/s40168-020-00863-4>.
- 496 20. Brown-Jaque M, Oyarzun LR, Cornejo-Sánchez T, Martín-Gómez MT, Gartner S, de  
497 Gracia J, Rovira S, Alvarez A, Jofre J, González-López JJ, Muniesa M. 2018.

- 498           Detection of bacteriophage particles containing antibiotic resistance genes in the  
499           sputum of cystic fibrosis patients. *Front Microbiol* 9:856.  
500           <https://doi.org/10.3389/fmicb.2018.00856>.
- 501   21.   Costa AR, Monteiro R, Azeredo J. 2018. Genomic analysis of *Acinetobacter*  
502           *baumannii* prophages reveals remarkable diversity and suggests profound impact on  
503           bacterial virulence and fitness. *Sci Rep* 8:15346. [https://doi.org/10.1038/s41598-018-](https://doi.org/10.1038/s41598-018-33800-5)  
504           33800-5.
- 505   22.   Bae T, Baba T, Hiramatsu K, Schneewind O. 2006. Prophages of *Staphylococcus*  
506           *aureus* Newman and their contribution to virulence. *Mol Microbiol* 62:1035–1047.  
507           <https://doi.org/10.1111/j.1365-2958.2006.05441.x>.
- 508   23.   Dini M, Shokoohizadeh L, Jalilian FA, Moradi A, Arabestani MR. 2019. Genotyping  
509           and characterization of prophage patterns in clinical isolates of *Staphylococcus aureus*.  
510           *BMC Res Notes* 12:669. <https://doi.org/10.1186/s13104-019-4711-4>.
- 511   24.   Hayashi T, Makino K, Ohnishi M, Kurokawa K, Ishii K, Yokoyama K, Han CG,  
512           Ohtsubo E, Nakayama K, Murata T, Tanaka M, Tobe T, Iida T, Takami H, Honda T,  
513           Sasakawa C, Ogasawara N, Yasunaga T, Kuhara S, Shiba T, Hattori M, Shinagawa H.  
514           2001. Complete genome sequence of enterohemorrhagic *Escherichia coli* O157:H7 and  
515           genomic comparison with a laboratory strain K-12. *DNA Res* 8:11–22.  
516           <https://doi.org/10.1093/dnares/8.1.11>.

- 517 25. Zhang Y, Liao Y Te, Salvador A, Sun X, Wu VCH. 2020. Prediction, Diversity, and  
518 Genomic Analysis of Temperate Phages Induced From Shiga Toxin-Producing  
519 *Escherichia coli* Strains. *Front Microbiol* 10:3093.  
520 <https://doi.org/10.3389/fmicb.2019.03093>.
- 521 26. Cooke FJ, Wain J, Fookes M, Ivens A, Thomson N, Brown DJ, Threlfall EJ, Gunn G,  
522 Foster G, Dougan G. 2007. Prophage sequences defining hot spots of genome variation  
523 in *Salmonella enterica* serovar Typhimurium can be used to discriminate between field  
524 isolates. *J Clin Microbiol* 45:2590–2598. <https://doi.org/10.1128/JCM.00729-07>.
- 525 27. Waldor MK, Mekalanos JJ. 1996. Lysogenic conversion by a filamentous phage  
526 encoding cholera toxin. *Science* 272:1910–1913.  
527 <https://doi.org/10.1126/science.272.5270.1910>.
- 528 28. Castillo D, Kauffman K, Hussain F, Kalatzis P, Rørbo N, Polz MF, Middelboe M.  
529 2018. Widespread distribution of prophage-encoded virulence factors in marine *Vibrio*  
530 communities. *Sci Rep* 8:9973. <https://doi.org/10.1038/s41598-018-28326-9>.
- 531 29. Kimmitt PT, Harwood CR, Barer MR. 1999. Induction of type 2 Shiga toxin synthesis  
532 in *Escherichia coli* 0157 by 4-quinolones. *Lancet* 353:1588–1589.  
533 [https://doi.org/10.1016/S0140-6736\(99\)00621-2](https://doi.org/10.1016/S0140-6736(99)00621-2).

- 534 30. Ingrey KT, Ren J, Prescott JF. 2003. A fluoroquinolone induces a novel mitogen-  
535 encoding bacteriophage in *Streptococcus canis*. *Infect Immun* 71:3028–3033.  
536 <https://doi.org/10.1128/IAI.71.6.3028-3033.2003>.
- 537 31. Rezaei Javan R, Ramos-Sevillano E, Akter A, Brown J, Brueggemann AB. 2019.  
538 Prophages and satellite prophages are widespread in *Streptococcus* and may play a role  
539 in pneumococcal pathogenesis. *Nat Commun* 10:4852. [https://doi.org/10.1038/s41467-](https://doi.org/10.1038/s41467-019-12825-y)  
540 [019-12825-y](https://doi.org/10.1038/s41467-019-12825-y).
- 541 32. Li Y, Huang J, Wang X, Xu C, Han T, Guo X. 2020. Genetic Characterization of the  
542 O-Antigen and Development of a Molecular Serotyping Scheme for *Enterobacter*  
543 *cloacae*. *Front Microbiol* 11:727. <https://doi.org/10.3389/fmicb.2020.00727>.
- 544 33. Wyres KL, Holt KE. 2018. *Klebsiella pneumoniae* as a key trafficker of drug  
545 resistance genes from environmental to clinically important bacteria. *Curr Opin*  
546 *Microbiol* 45:131–139. <https://doi.org/10.1016/j.mib.2018.04.004>.
- 547 34. Enault F, Briet A, Bouteille L, Roux S, Sullivan MB, Petit MA. 2017. Phages rarely  
548 encode antibiotic resistance genes: A cautionary tale for virome analyses. *ISME J*  
549 11:237–247. <https://doi.org/10.1038/ismej.2016.90>.
- 550 35. Volkova V V., Lu Z, Besser T, Gröhn YT. 2014. Modeling the infection dynamics of  
551 bacteriophages in enteric *Escherichia coli*: Estimating the contribution of transduction

- 552 to antimicrobial gene spread. *Appl Environ Microbiol* 80:4350–4362.
- 553 <https://doi.org/10.1128/AEM.00446-14>.
- 554 36. Modi SR, Lee HH, Spina CS, Collins JJ. 2013. Antibiotic treatment expands the
- 555 resistance reservoir and ecological network of the phage metagenome. *Nature*
- 556 499:219–222. <https://doi.org/10.1038/nature12212>.
- 557 37. Colomer-Lluch M, Calero-Cáceres W, Jebri S, Hmaied F, Muniesa M, Jofre J. 2014.
- 558 Antibiotic resistance genes in bacterial and bacteriophage fractions of Tunisian and
- 559 Spanish wastewaters as markers to compare the antibiotic resistance patterns in each
- 560 population. *Environ Int* 73:167–175. <https://doi.org/10.1016/j.envint.2014.07.003>.
- 561 38. Venturini C, Zingali T, Wyrsh ER, Bowring B, Iredell J, Partridge SR, Djordjevic SP.
- 562 2019. Diversity of P1 phage-like elements in multidrug resistant *Escherichia coli*. *Sci*
- 563 *Rep* 9:18861. <https://doi.org/10.1038/s41598-019-54895-4>.
- 564 39. Wang M, Zeng Z, Jiang F, Zheng Y, Shen H, Macedo N, Sun Y, Sahin O, Li G. 2020.
- 565 Role of enterotoxigenic *Escherichia coli* prophage in spreading antibiotic resistance in
- 566 a porcine-derived environment. *Environ Microbiol* [https://doi.org/10.1111/1462-](https://doi.org/10.1111/1462-2920.15084)
- 567 [2920.15084](https://doi.org/10.1111/1462-2920.15084)<https://doi.org/10.1111/1462-2920.15084>.
- 568 40. Asadulghani M, Ogura Y, Ooka T, Itoh T, Sawaguchi A, Iguchi A, Nakayama K,
- 569 Hayashi T. 2009. The defective prophage pool of *Escherichia coli* O157: Prophage-

- 570 prophage interactions potentiate horizontal transfer of virulence determinants. PLoS  
571 Pathog 5:e1000408. <https://doi.org/10.1371/journal.ppat.1000408>.
- 572 41. Wang X, Kim Y, Ma Q, Hong SH, Pokusaeva K, Sturino JM, Wood TK. 2010. Cryptic  
573 prophages help bacteria cope with adverse environments. Nat Commun 1:147.  
574 <https://doi.org/10.1038/ncomms1146>.
- 575 42. Wendling C, Refardt D, Hall A. 2020. Fitness Benefits To Bacteria of Carrying  
576 Prophages and Prophage-Encoded Antibiotic-Resistance Genes Peak in Different  
577 Environments. bioRxiv  
578 <https://doi.org/10.1101/2020.03.13.990044><https://doi.org/10.1101/2020.03.13.990044>.
- 579 43. Bobay LM, Touchon M, Rocha EPC. 2014. Pervasive domestication of defective  
580 prophages by bacteria. Proc Natl Acad Sci U S A 111:12127–12132.  
581 <https://doi.org/10.1073/pnas.1405336111>.
- 582 44. Abedon ST, LeJeune JT. 2005. Why Bacteriophage Encode Exotoxins and other  
583 Virulence Factors. Evol Bioinforma 1:97–110.  
584 <https://doi.org/10.1177/117693430500100001>.
- 585 45. Bondy-Denomy J, Qian J, Westra ER, Buckling A, Guttman DS, Davidson AR,  
586 Maxwell KL. 2016. Prophages mediate defense against phage infection through  
587 diverse mechanisms. ISME J 10:2854–2866. <https://doi.org/10.1038/ismej.2016.79>.



- 588 46. Dedrick RM, Jacobs-Sera D, Guerrero Bustamante CA, Garlena RA, Mavrigh TN,  
589 Pope WH, Cervantes Reyes JC, Russell DA, Adair T, Alvey R, Bonilla JA, Bricker JS,  
590 Brown BR, Byrnes D, Cresawn SG, Davis WB, Dickson LA, Edgington NP, Findley  
591 AM, Golebiewska U, Grose JH, Hayes CF, Hughes LE, Hutchison KW, Isern S,  
592 Johnson AA, Kenna MA, Klyczek KK, Mageeney CM, Michael SF, Molloy SD,  
593 Montgomery MT, Neitzel J, Page ST, Pizzorno MC, Poxleitner MK, Rinehart CA,  
594 Robinson CJ, Rubin MR, Teyim JN, Vazquez E, Ware VC, Washington J, Hatfull GF.  
595 2017. Prophage-mediated defence against viral attack and viral counter-defence. *Nat*  
596 *Microbiol* 2:16251. <https://doi.org/10.1038/nmicrobiol.2016.251>.
- 597 47. Fouhy F, Ogilvie LA, Jones B V., Ross RP, Ryan AC, Dempsey EM, Fitzgerald GF,  
598 Stanton C, Cotter PD. 2014. Identification of aminoglycoside and  $\beta$ -lactam resistance  
599 genes from within an infant gut functional metagenomic library. *PLoS One* 9:e108016.  
600 <https://doi.org/10.1371/journal.pone.0108016>.
- 601 48. Ullmann IF, Tunsjø HS, Andreassen M, Nielsen KM, Lund V, Charnock C. 2019.  
602 Detection of aminoglycoside resistant bacteria in sludge samples from Norwegian  
603 drinking water treatment plants. *Front Microbiol* 10:487.  
604 <https://doi.org/10.3389/fmicb.2019.00487>.
- 605 49. Ramirez MS, Tolmasky ME. 2010. Aminoglycoside modifying enzymes. *Drug Resist*  
606 *Updat* 13:151–171. <https://doi.org/10.1016/j.drug.2010.08.003>.

- 607 50. Lee KI, Kusumoto M, Sekizuka T, Kuroda M, Uchida I, Iwata T, Okamoto S, Yabe K,  
608 Inaoka T, Akiba M. 2015. Extensive amplification of GI-VII-6, a multidrug resistance  
609 genomic island of *Salmonella enterica* serovar Typhimurium, increases resistance to  
610 extended-spectrum cephalosporins. *Front Microbiol* 6:78.  
611 <https://doi.org/10.3389/fmicb.2015.00078>.
- 612 51. Steenwyk JL, Rokas A. 2018. Copy number variation in fungi and its implications for  
613 wine yeast genetic diversity and adaptation. *Front Microbiol* 9:288.  
614 <https://doi.org/10.3389/fmicb.2018.00288>.
- 615 52. Force A, Lynch M, Pickett FB, Amores A, Yan YL, Postlethwait J. 1999. Preservation  
616 of duplicate genes by complementary, degenerative mutations. *Genetics* 151:1531–  
617 1545.
- 618 53. Billard-Pomares T, Fouteau S, Jacquet ME, Roche D, Barbe V, Castellanos M, Bouet  
619 JY, Cruveiller S, Médigue C, Blanco J, Clermont O, Denamur E, Branger C. 2014.  
620 Characterization of a P1-like bacteriophage carrying an SHV-2 extended-spectrum  $\beta$ -  
621 lactamase from an *Escherichia coli* strain. *Antimicrob Agents Chemother* 58:6550–  
622 6557. <https://doi.org/10.1128/AAC.03183-14>.
- 623 54. Radstrom P, Skold O, Swedberg G, Flensburg J, Roy PH, Sundstrom L. 1994.  
624 Transposon Tn5090 of plasmid R751, which carries an integron, is related to Tn7, Mu,

- 625 and the retroelements. *J Bacteriol* 176:3257–3268.
- 626 <https://doi.org/10.1128/jb.176.11.3257-3268.1994>.
- 627 55. Melton-celsa AR. 2014. Shiga Toxin (Stx) Classification, Structure, and Function.
- 628 *Microbiol Spectr* 2:EHEC-0024–0013. [https://doi.org/10.1128/microbiolspec.EHEC-](https://doi.org/10.1128/microbiolspec.EHEC-0024-2013)
- 629 [0024-2013](https://doi.org/10.1128/microbiolspec.EHEC-0024-2013).Correspondence.
- 630 56. Jarvis KG, Girón JA, Jerse AE, Mcdaniel TK, Donnenberg MS, Kaper JB. 1995.
- 631 Enteropathogenic *Escherichia coli* contains a putative type III secretion system
- 632 necessary for the export of proteins involved in attaching and effacing lesion
- 633 formation. *Proc Natl Acad Sci U S A* 92:7996–8000.
- 634 <https://doi.org/10.1073/pnas.92.17.7996>.
- 635 57. d’Humières C, Touchon M, Dion S, Cury J, Ghoulane A, Garcia-Garcera M, Bouchier
- 636 C, Ma L, Denamur E, P.C.Rocha E. 2019. A simple, reproducible and cost-effective
- 637 procedure to analyse gut phageome: from phage isolation to bioinformatic approach.
- 638 *Sci Rep* 9:11331. <https://doi.org/10.1038/s41598-019-47656-w>.
- 639 58. Cock PJA, Antao T, Chang JT, Chapman BA, Cox CJ, Dalke A, Friedberg I,
- 640 Hamelryck T, Kauff F, Wilczynski B, De Hoon MJL. 2009. Biopython: Freely
- 641 available Python tools for computational molecular biology and bioinformatics.
- 642 *Bioinformatics* 25:1422–1423. <https://doi.org/10.1093/bioinformatics/btp163>.

- 643 59. Arndt D, Grant JR, Marcu A, Sajed T, Pon A, Liang Y, Wishart DS. 2016. PHASTER:  
644 a better, faster version of the PHAST phage search tool. *Nucleic Acids Res* 44:W16–  
645 W21. <https://doi.org/10.1093/nar/gkw387>.
- 646 60. Zankari E, Hasman H, Cosentino S, Vestergaard M, Rasmussen S, Lund O, Aarestrup  
647 FM, Larsen MV. 2012. Identification of acquired antimicrobial resistance genes. *J*  
648 *Antimicrob Chemother* 67:2640–2644. <https://doi.org/10.1093/jac/dks261>.
- 649 61. Chen L, Zheng D, Liu B, Yang J, Jin Q. 2016. VFDB 2016: Hierarchical and refined  
650 dataset for big data analysis - 10 years on. *Nucleic Acids Res* 44:D694–D697.  
651 <https://doi.org/10.1093/nar/gkv1239>.
- 652 62. Moura A, Soares M, Pereira C, Leitão N, Henriques I, Correia A. 2009. INTEGRALL:  
653 A database and search engine for integrons, integrases and gene cassettes.  
654 *Bioinformatics* 25:1096–1098. <https://doi.org/10.1093/bioinformatics/btp105>.
- 655 63. Alikhan NF, Petty NK, Ben Zakour NL, Beatson SA. 2011. BLAST Ring Image  
656 Generator (BRIG): Simple prokaryote genome comparisons. *BMC Genomics* 12:402.  
657 <https://doi.org/10.1186/1471-2164-12-402>.
- 658 64. Sullivan MJ, Petty NK, Beatson SA. 2011. Easyfig: A genome comparison visualizer.  
659 *Bioinformatics* 27:1009–1010. <https://doi.org/10.1093/bioinformatics/btr039>.
- 660

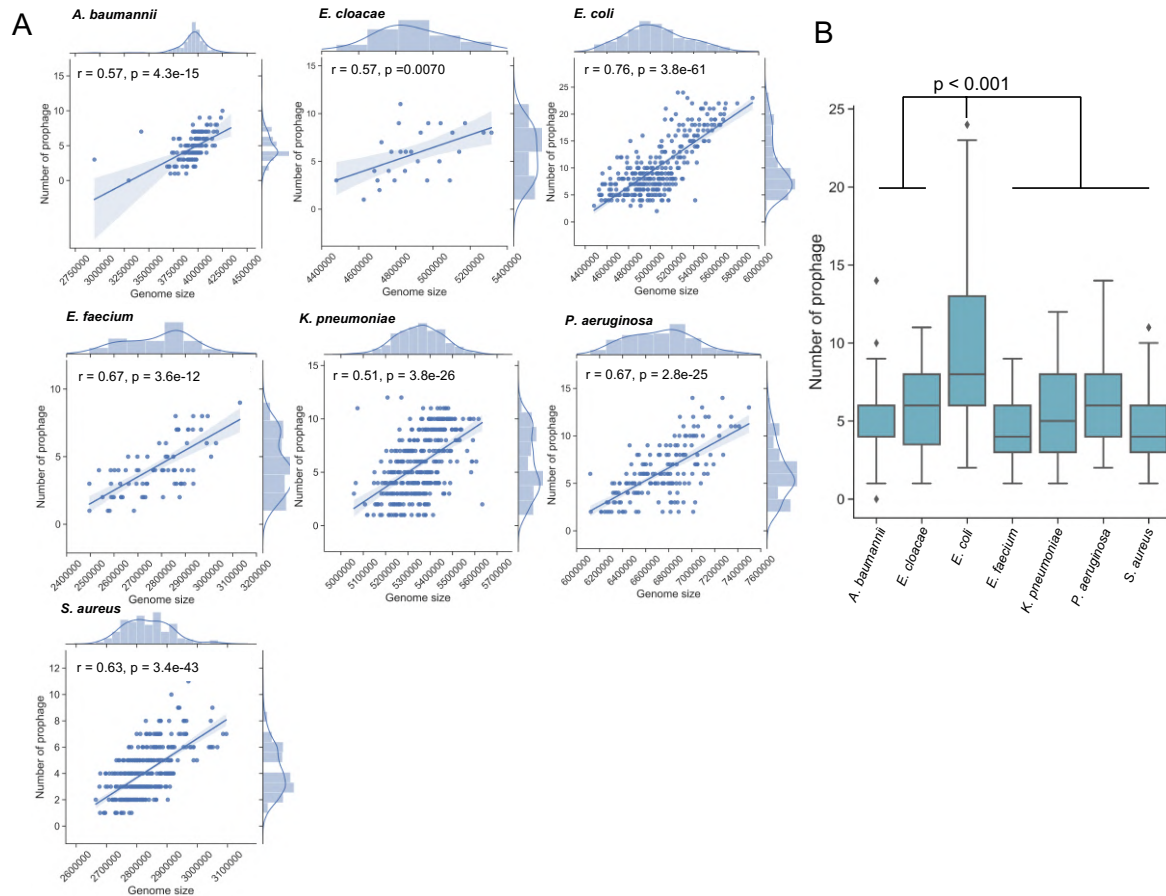

FIG 1 Comparison of genome length and the number of prophages. (A) Correlation and scatter plot of genome length excluding plasmids and the number of prophages. Plasmid samples were excluded to avoiding genome length bias. RefSeq and the complete genome were collected from the NCBI, and we evaluated the correlation between each genome length and the number of prophages obtained from PHASTER.  $r$  value indicates the Pearson's correlation coefficient. (B) Box and whisker plot comparing the number of prophages for each species. The line inner box shows the median. Welch's t-test was performed and  $P < 0.05$  was considered as significant.

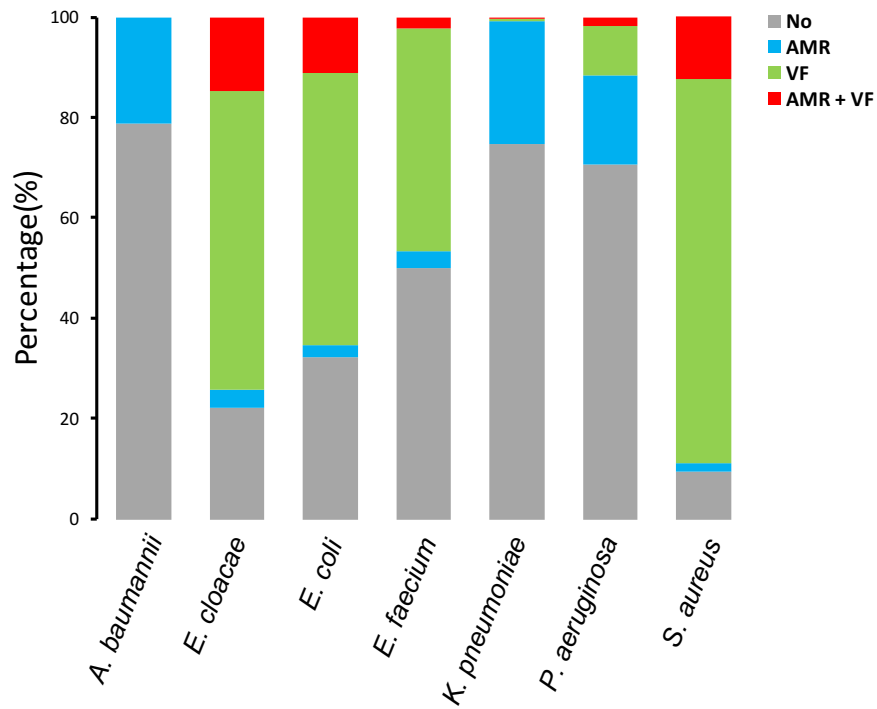

FIG 2 Proportion of the host genomes having prophages with AMR or VF genes. A bar chart showing the genome of each species that have the AMR and/or VF gene-containing prophages. Blue represents strains with AMR genes, green represents strains having VF genes, and red represents the strains having both AMR and VF genes. Gray shows strains having neither AMR nor VF genes.

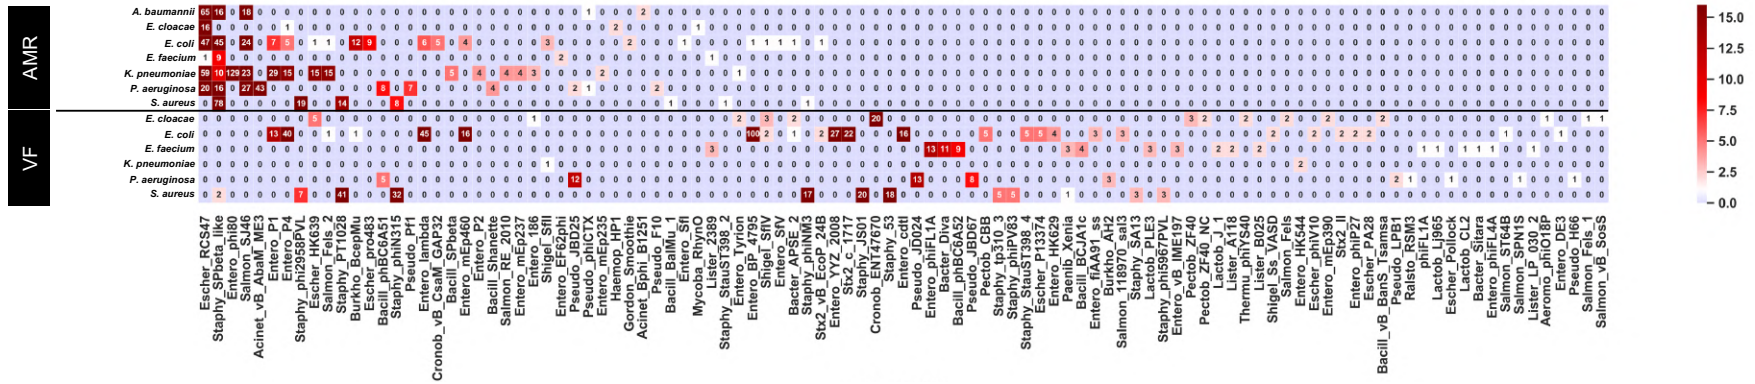

FIG 3 The type of prophages containing AMR and VF genes. Each prophage region that possessed AMR or VF genes was classified based on the most common phage in PHASTER. Heatmap shows the abundance of prophage type in each genus. The bottom represents prophage types described in PHASTER. The numeric character in each cell represents the number of detected phage names described in the most common phages on PHASTER. AMR, above the black line; VR, below the black line.

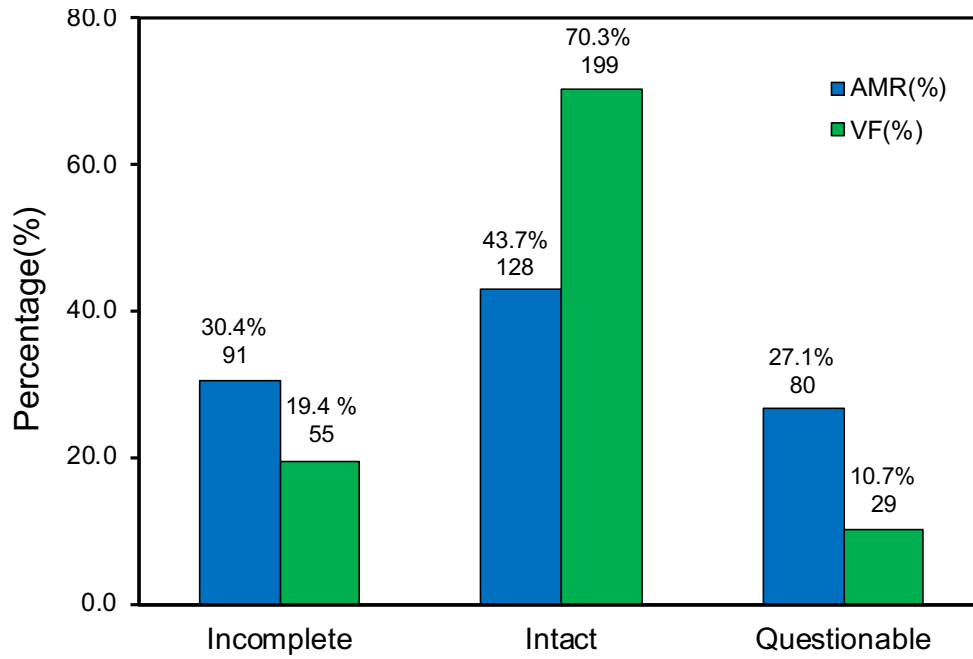

FIG 4 Analysis of prophage completeness using AMR or VF genes. Each prophage that had AMR or VF genes was classified as incomplete, intact, or questionable depending on the length and their completeness. The blue bar shows the percentage of AMR genes encoded in the prophage region, the green bar shows the percentage of prophages with a VF gene. Percentages regarded all AMR- or VF-encoding prophages as 100% and the numerical character below the percentage indicates the number of samples in each classification.



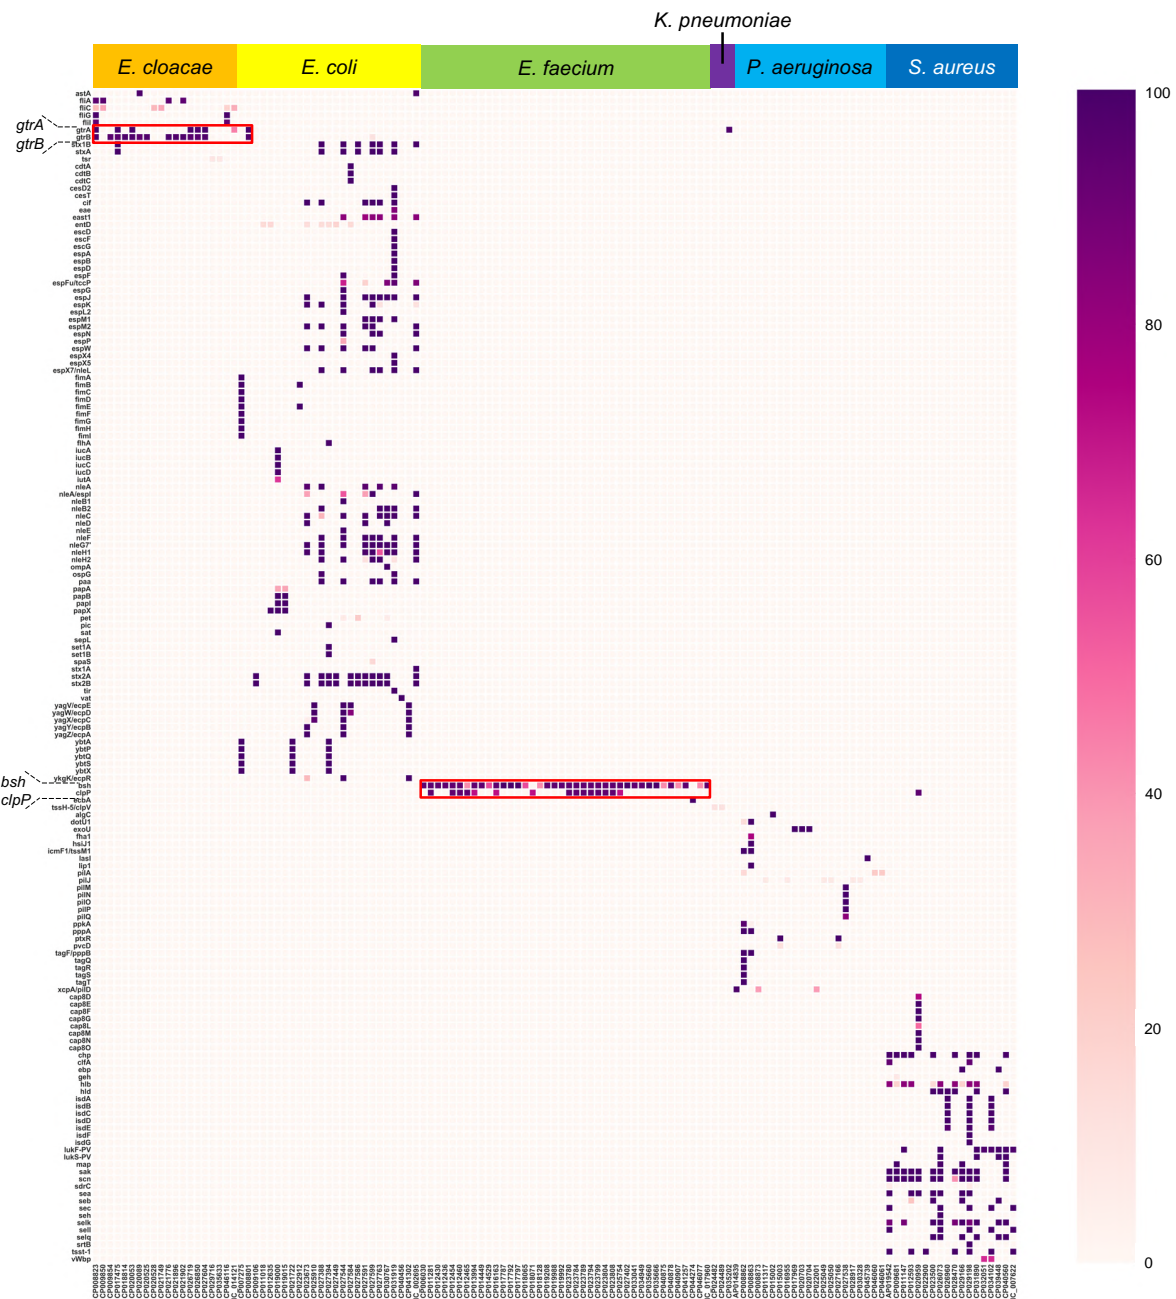

FIG 5 Distribution of VF genes in the prophage regions. DNA sequences of the prophage regions extracted from PHASTER were examined for the presence or absence of various VF genes using the VFDB database. The color density of the heatmap represents the coverage for each gene. The red frames show *gtrA*, *gtrB* and *bsh*. VF genes in *S. aureus* and *E. coli* are shown as the representative strains. All VF genes harbored by prophages are listed in Table S3.

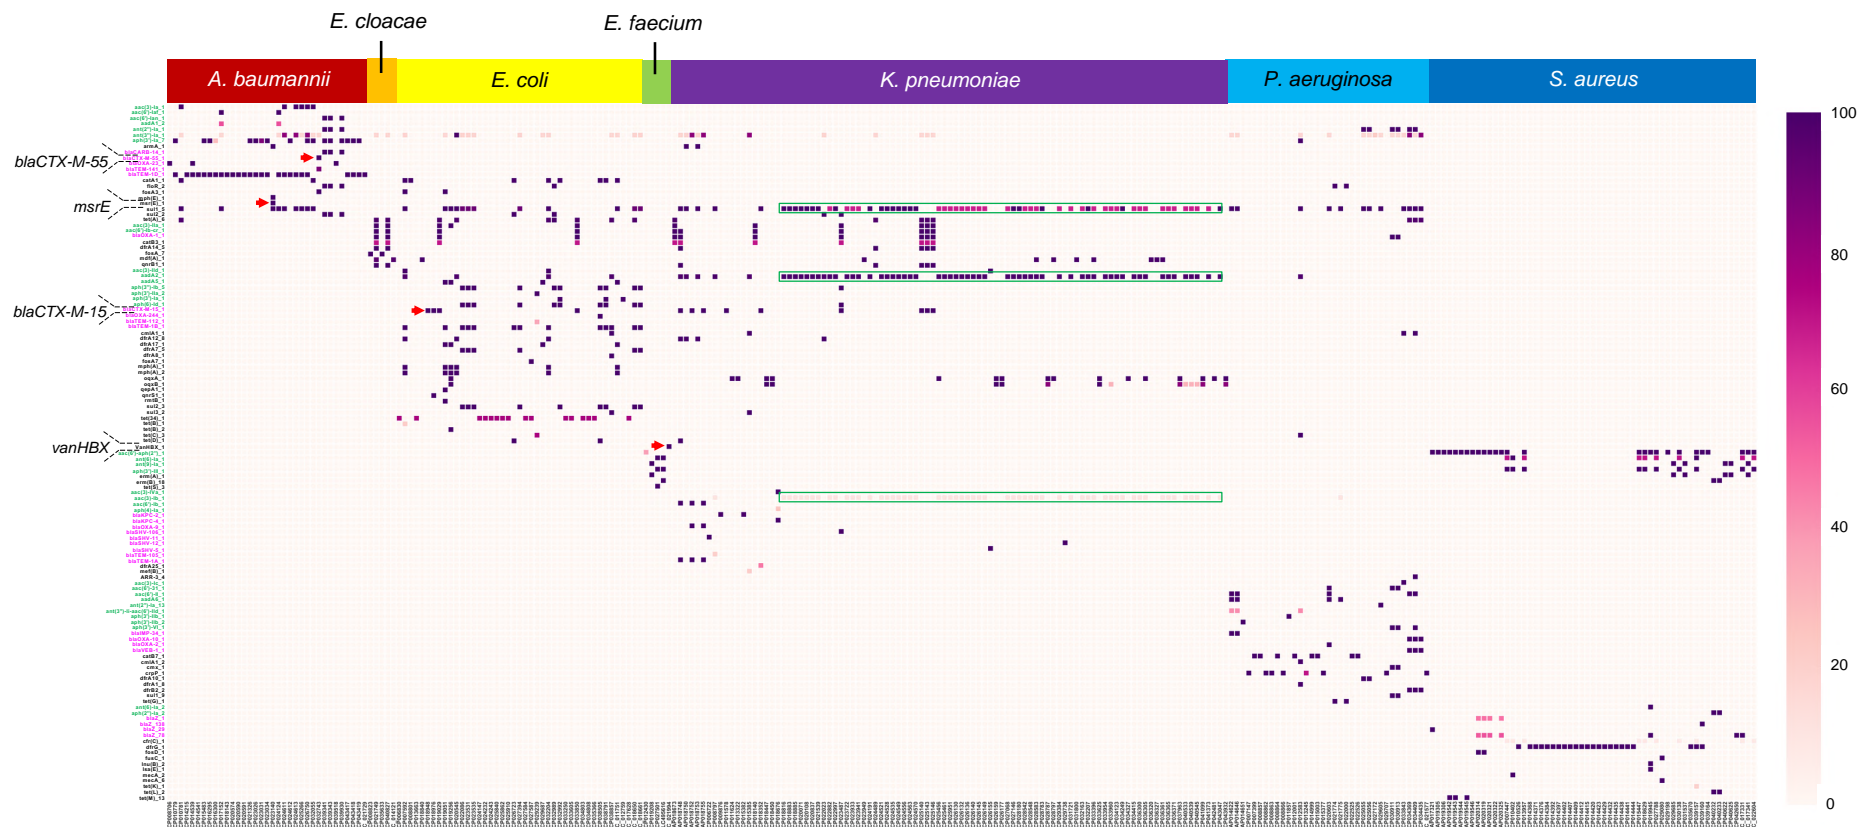

FIG 6 Distribution of AMR genes in the prophage region. We investigated the AMR genes in prophage regions extracted from PHASTER. AMR genes were detected using the ResFinder database. The color density of the heatmap represents the coverage of each gene. Green frame indicates the AMR genes cassette array detected in the *K. pneumoniae*. AMR genes, highlighted in green and magenta, show resistant genes against aminoglycoside and  $\beta$ -lactam, respectively. Magnified AMR gene names and red arrow represent AMR genes described in the results.

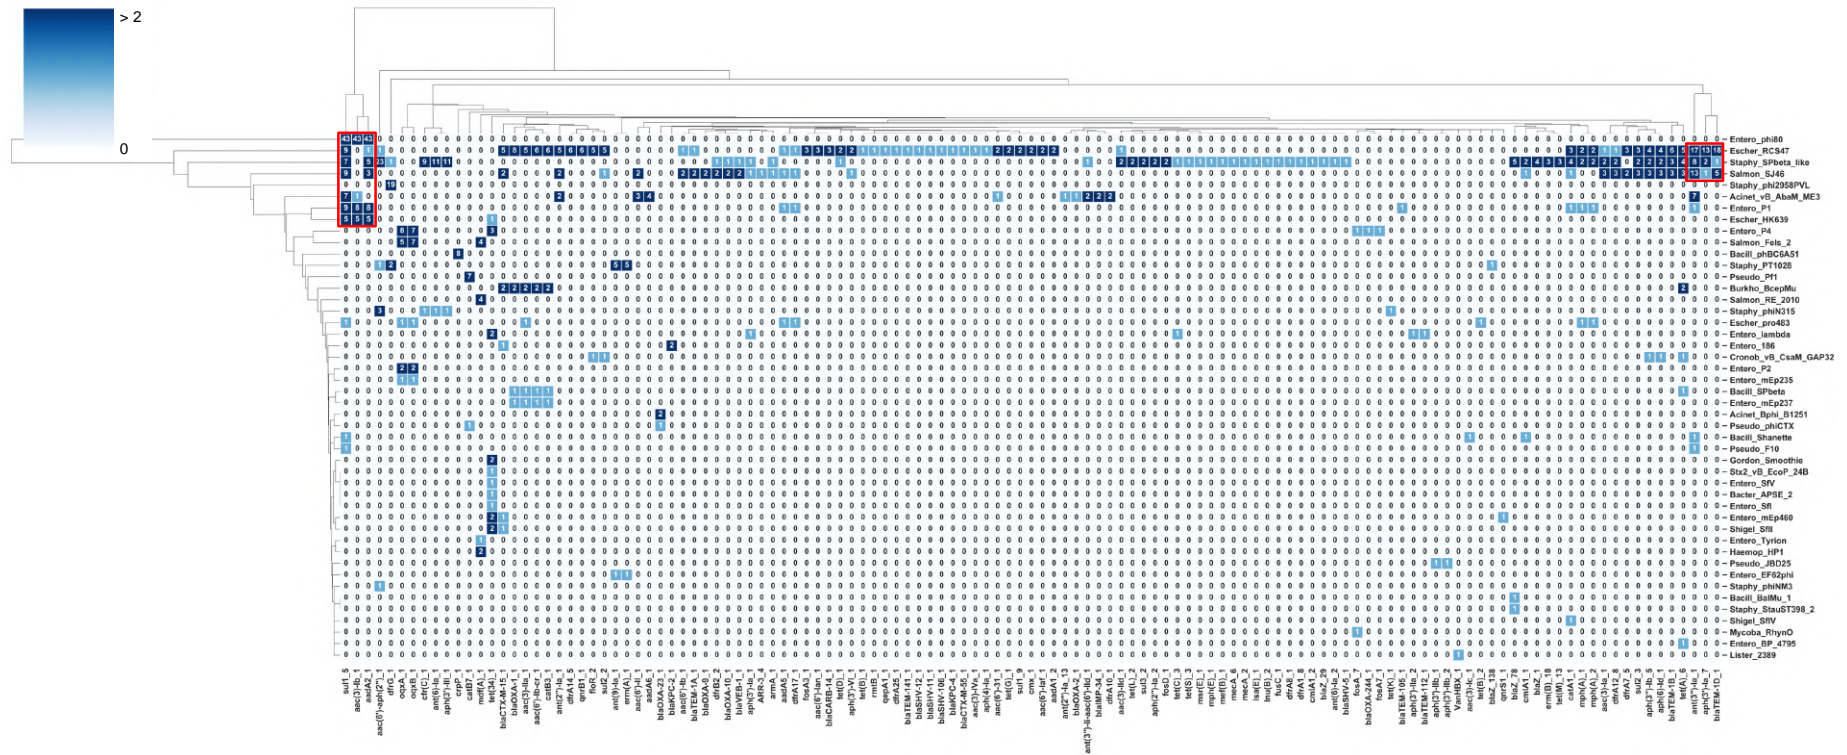

FIG 7 Cluster analysis of AMR gene-encoding prophages. Each prophage type included in all bacterial species used in this study was clustered under the same prophage name and visualized via a heatmap. The figure was created using seaborn, which is a Python module, and cluster method, which is a hierarchical clustering method (single linkage method). The numerical characters in cells mean the number of AMR genes in the indicated prophage. The red frames indicate the examples of cassette arrays of antibiotic resistance genes in the prophage region.

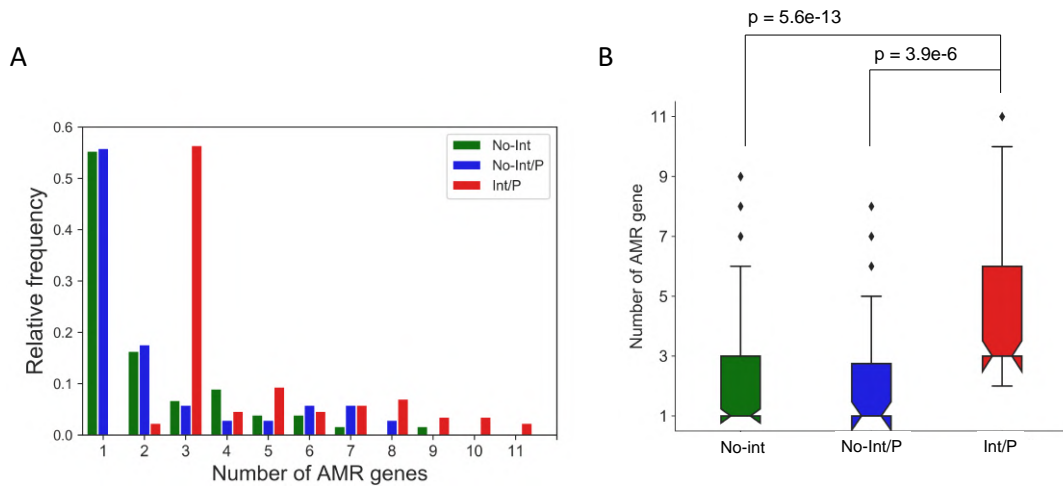

FIG 8 Comparison of the number of AMR genes with and without an integron. No-Int is a strain that does not have an integron, No-Int/P represents that the integron is located out of the prophage region, Int/P is a strain that has an integron in the prophage. Integron within a prophage was classified according to whether it has class 1 integrase or not. (A) The histogram shows the relative frequency of each number of AMR genes in each classification. (B) The boxplot shows the number of AMR genes in each classification. The notch of the boxplot represents the median, and Welch's t-test was performed with  $P < 0.05$  considered as significant.

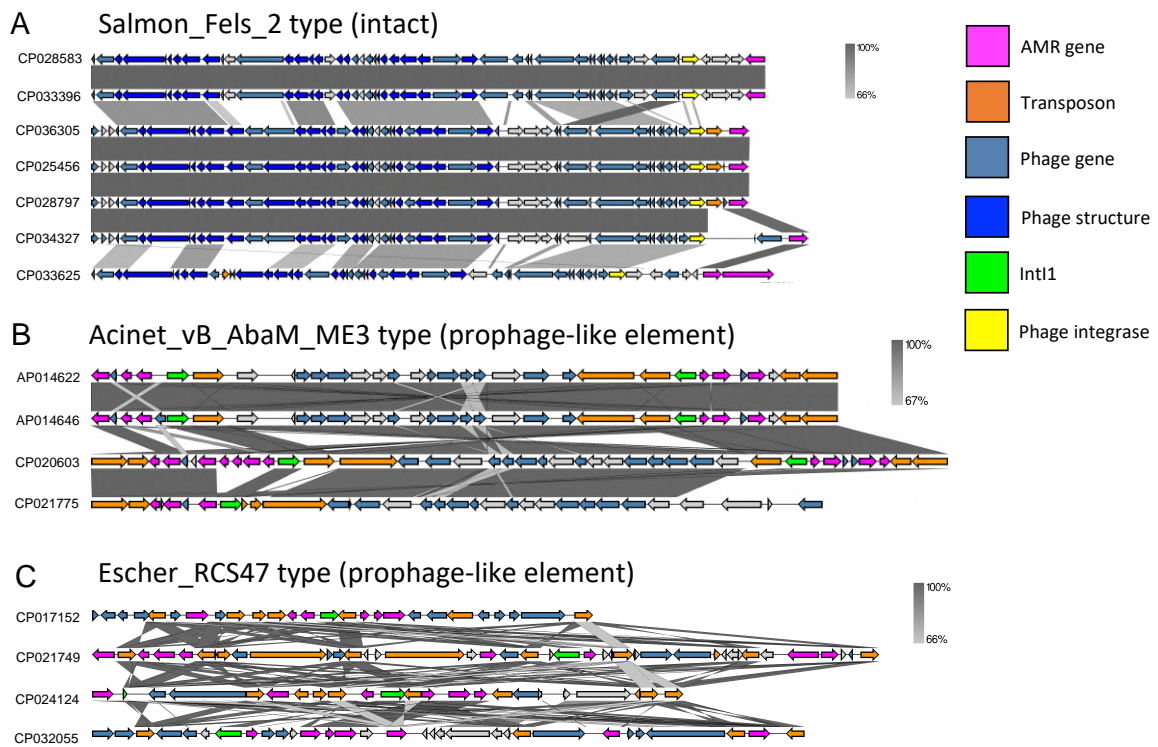

FIG 9 Comparative analysis of sequences and positional characteristics of AMR genes encoded by prophages. Representative prophage type names were selected based on genome completeness. Prophage sequences were defined via the attachment sites (*attL*, *attR*). (a) Salmon\_Fels\_2 prophage type was selected as an intact prophage; (b) Acinet\_vB\_AbaM\_ME3 and (c) Escher\_RCS47 were selected as prophage-like element (incomplete and questionable) prophages. The sequences of each prophage were selected at random and gray-shaded region represents the sequence similarity. Int1 shows the class 1 integrase, which is shown by the green arrow, and phage-derived integrase is shown by the yellow arrow. AMR genes are shown in magenta. The figures were drawn using Easyfig 2.2.2.

### Supplementary material

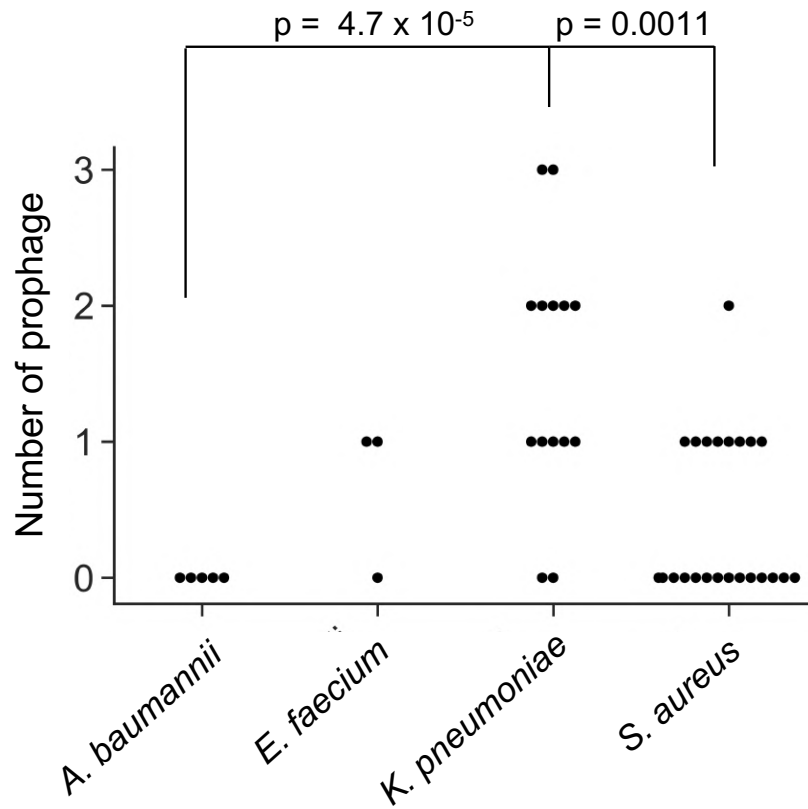

FIG S1 Comparison of the number of prophages present on the plasmid. The number of prophage regions on the plasmid was compared. Welch's t-test was performed and  $P < 0.05$  was considered significant.

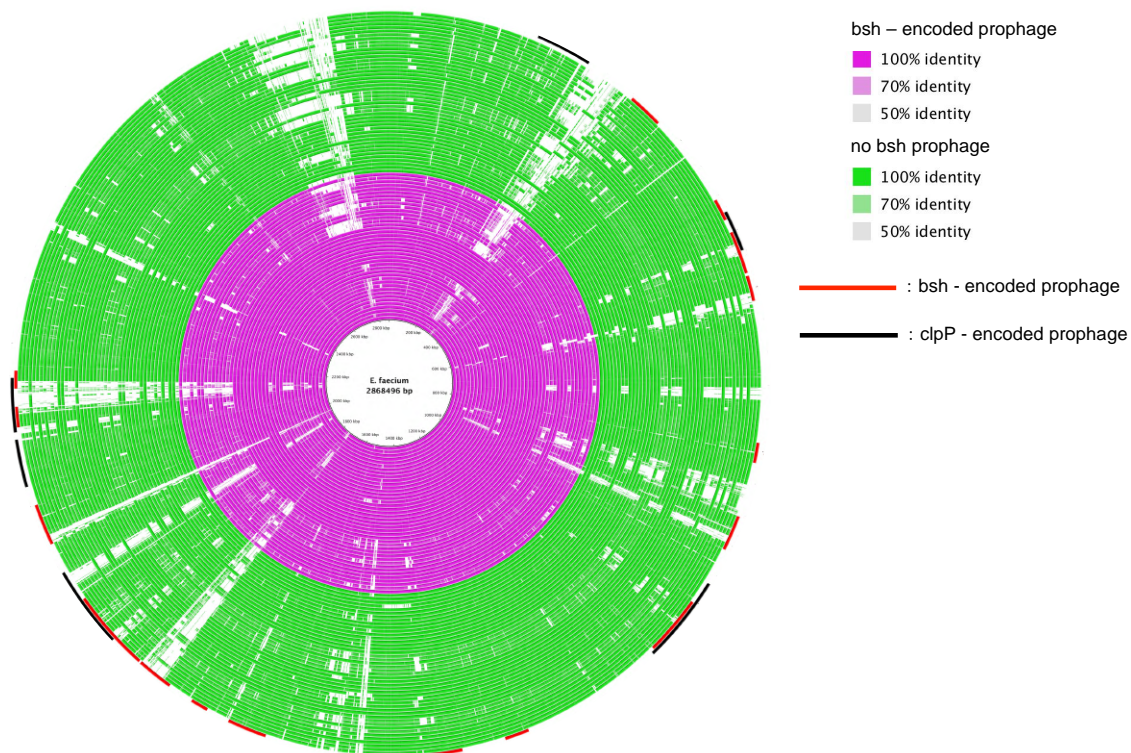

FIG S2 The mapping of prophages encoding *bsh* and *clpP* in *E. faecium*. The red circles (the inner circle) indicate the genome that includes *bsh*, and the green circles indicate the genome that does not include *bsh* in the prophage region. The red arc indicates the prophage region encoding *bsh*, and the black arc indicates that encoding *clpP*. The gap shows less homology (< 50 %) with the original genome. The figure was created using BRIG.

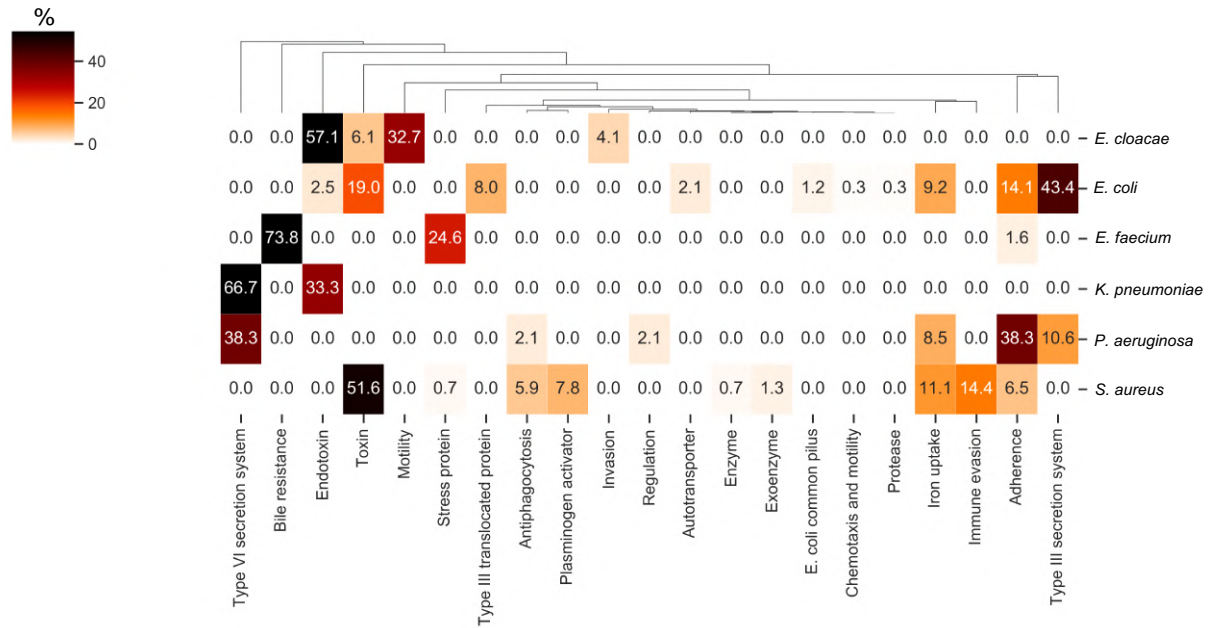

FIG S3 Classification of VF genes encoded by prophages. Each VF gene was classified based on the keywords described in the VFDB. VF genes harbored by prophages were not found in *A. baumannii*. The numerical value in the heat map indicates the percentage (%) classified into keywords for each strain.
